# Supplementary material
Source: ML conference proceedings conference paper supplement (https://proceedings.mlr.press/v38/li15f.html)
Supplement: Supplementary file 1 [file li15f-supp.pdf]

# Sparsistency of $\ell_1$ -Regularized $M$ -Estimators: Supplementary Material

**Yen-Huan Li**  
LIONS, EPFL

**Jonathan Scarlett**  
LIONS, EPFL

**Pradeep Ravikumar**  
University of Texas at Austin

**Volkan Cevher**  
LIONS, EPFL

## 1 Auxiliary Result for the Non-Structured Case

In this section, we prove the following claim made in Section 3. Note that, in contrast to the main definition of the LSSC, the vectors here are *not* necessarily structured.

**Proposition 1.1.** *Consider a function  $f \in \mathcal{C}^3(\text{dom } f)$  with domain  $\text{dom } f \subseteq \mathbb{R}^p$ . Fix  $x^* \in \text{dom } f$ , and let  $\mathcal{N}_{x^*}$  be an open set in  $\text{dom } f$  containing  $x^*$ . Let  $K \geq 0$ . The following statements are equivalent.*

1.  $D^2 f(x)$  is locally Lipschitz continuous with respect to  $x^*$ ; that is,

$$\|D^2 f(x^* + \delta) - D^2 f(x^*)\|_2 \leq K \|\delta\|_2, \quad (1)$$

for all  $\delta \in \mathbb{R}^p$  such that  $x^* + \delta \in \mathcal{N}_{x^*}$ .

2.  $D^3 f(x)$  is locally bounded; that is,

$$|D^3 f(x^* + \delta)[u, v, w]| \leq K \|u\|_2 \|v\|_2 \|w\|_2 \quad (2)$$

for all  $\delta \in \mathbb{R}^p$  such that  $x^* + \delta \in \mathcal{N}_{x^*}$ , and for all  $u, v, w \in \mathbb{R}^p$ .

*Proof.* Suppose that (1) holds. By Proposition 3.3, it suffices to prove that

$$|D^3 f(x^* + \delta)[u, u, u]| \leq K \|u\|_2^3$$

for all  $u \in \mathbb{R}^p$ . By definition, we have

$$\begin{aligned} |D^3 f(x^* + \delta)[u, u, u]| &= |\langle u, H u \rangle| \\ &\leq \|H\|_2 \|u\|^2, \end{aligned}$$

where

$$H := \lim_{t \rightarrow 0} \frac{D^2 f(x^* + \delta + tu) - D^2 f(x^* + \delta)}{t}.$$

We therefore have (2) since  $\|H\|_2 \leq K \|\delta\|_2$  by (1).

Conversely, suppose that (2) holds. We have the following Taylor expansion [Zeidler, 1995]:

$$D^2 f(x^* + \delta) = D^2 f(x^*) + \int_0^1 D^3 f(x_t)[\delta] dt,$$

where  $x_t := x^* + t\delta$ . We also have from (2) and the definition of the spectral norm that  $\|D^3 f(x^* + \delta)[\delta]\|_2 \leq K \|u\|_2$ , and hence

$$\begin{aligned} &\|D^2 f(x^* + \delta) - D^2 f(x^*)\|_2 \\ &= \left\| \int_0^1 D^3 f(x_t)[\delta] dt \right\|_2 \\ &\leq K \|\delta\|_2. \end{aligned}$$

This completes the proof.  $\square$

## 2 Proof of Theorem 5.1

The proof is based on the optimality conditions on  $\hat{\beta}$  for the original problem, and those on  $\check{\beta}$  for the restricted problem. We first observe that  $\check{\beta}_n$  exists, since the function  $x \mapsto \|x\|_1$  is coercive. Recall that  $\check{\beta}_n$  is assumed to be uniquely defined.

To achieve sparsistency, it suffices that  $\hat{\beta}_n = \check{\beta}_n$  and  $\text{supp } \check{\beta}_n = \text{supp } \beta^*$ . We derive sufficient conditions for  $\hat{\beta}_n = \check{\beta}_n$  in Lemma 2.1, and make this sufficient condition explicitly dependent on the problem parameters in Lemma 2.2. This lemma will require that  $\|\check{\beta}_n - \beta^*\|_2 \leq R_n$  for some  $R_n > 0$ . We will derive an estimation error bound of the form  $\|\check{\beta}_n - \beta^*\|_2 \leq r_n$  in Lemma 2.4. We will then conclude that  $\hat{\beta}_n = \check{\beta}_n$  if  $r_n \leq R_n$  and the assumptions in Lemma 2.2 are satisfied, from which it will follow that  $\text{sign } \check{\beta} = \text{sign } \beta^*$  provided that  $\beta_{\min} \geq r_n$ .

The following lemma is proved via an extension of the techniques of [Wainwright, 2009].

**Lemma 2.1.** *We have  $\hat{\beta}_n = \check{\beta}_n$  if*

$$\|[\nabla L_n(\check{\beta}_n)]_{\mathcal{S}^c}\|_\infty < \tau_n. \quad (3)$$

*Proof.* Recall that  $L_n$  is convex by assumption. Also recall that  $\check{\beta}_n$  is assumed to be uniquely defined, and hence it is the only vector that satisfies the corresponding optimality condition:

$$[\nabla L_n(\check{\beta}_n)]_{\mathcal{S}} + \tau_n \check{z}_{\mathcal{S}} = 0 \quad (4)$$

for some  $\check{z}_S$  such that  $\|\check{z}_S\|_\infty \leq 1$ . Moreover, the fact that (3) is satisfied means that there exists  $\check{z}_{S^c}$  such that  $\|\check{z}_{S^c}\|_\infty < 1$  and

$$\nabla L_n(\check{\beta}_n) + \tau_n \check{z} = 0,$$

where  $\check{z} := (\check{z}_S, \check{z}_{S^c})$ . Therefore,  $\check{\beta}_n$  is a minimizer of the original optimization problem in  $\mathbb{R}^p$ .

We now address the uniqueness of  $\hat{\beta}$ . By a similar argument to Lemma 1 in [Ravikumar et al., 2010] (see also Lemma 1(b) in [Wainwright, 2009]), any minimizer  $\tilde{\beta}$  of the original optimization problem satisfies  $\tilde{\beta}_{S^c} = 0$ . Thus, since  $\check{\beta}$  is the only optimal vector for the restricted optimization problem, we conclude that  $\hat{\beta}_n = \check{\beta}_n$  uniquely.  $\square$

We now combine Lemma 2.1 with the assumptions of Theorem 5.1 to obtain the following.

**Lemma 2.2.** *Under assumptions 1, 2, 3 and 6 of Theorem 5.1, we have  $\hat{\beta}_n = \check{\beta}_n$  if  $\check{\beta} \in \mathcal{N}_{\beta^*} \cap \mathcal{B}_{R_n}$ , where  $\mathcal{B}_{R_n} := \{\beta : \|\beta - \beta^*\|_2 \leq R_n, \beta_{S^c} = 0, \beta \in \mathbb{R}^p\}$  with*

$$R_n = \frac{1}{2} \sqrt{\frac{\alpha \tau_n}{K}}. \quad (5)$$

*Proof.* Applying a Taylor expansion at  $\beta^*$ , and noting that both  $\beta^*$  and  $\check{\beta}_n$  are supported on  $\mathcal{S}$ , we obtain

$$\begin{aligned} [\nabla L(\check{\beta}_n)]_{S^c} &= [\nabla L_n(\beta^*)]_{S^c} \\ &\quad + [\nabla^2 L_n(\beta^*)]_{S^c, S} (\check{\beta}_n - \beta^*)_S \\ &\quad + (\epsilon_n)_{S^c}, \end{aligned} \quad (6)$$

where the remainder term is given by

$$\epsilon_n = \int_0^1 (1-t) D^3 L_n(\beta_t) [\check{\beta} - \beta^*, \check{\beta} - \beta^*] dt$$

with  $\beta_t := \beta^* + t(\check{\beta} - \beta^*)$  (see Section 4.5 of [Zeidler, 1995]), and thus satisfies

$$\|\epsilon_n\|_\infty \leq \sup_{t \in [0,1]} \{ \|D^3 L_n(\beta_t) [\check{\beta} - \beta^*, \check{\beta} - \beta^*]\|_\infty \}. \quad (7)$$

Recall the optimality condition for  $\check{\beta}$  in (4). Again using a Taylor expansion, we can write this condition as

$$\begin{aligned} [\nabla L_n(\beta^*)]_S + [\nabla^2 L_n(\beta^*)]_{S, S} (\check{\beta}_n - \beta^*)_S \\ + (\epsilon_n)_S + \tau_n \check{z}_S = 0. \end{aligned} \quad (8)$$

Recall that  $[\nabla^2 L_n(\beta^*)]_{S, S}$  is invertible by the second assumption of Theorem 5.1. Solving for  $(\check{\beta}_n - \beta^*)_S$  in

(8) and substituting the solution into (6), we obtain

$$\begin{aligned} &[\nabla L_n(\check{\beta}_n)]_{S^c} \\ &= -\tau_n [\nabla^2 L_n(\beta^*)]_{S^c, S} [\nabla^2 L_n(\beta^*)]_{S, S}^{-1} \check{z}_S \\ &\quad + [\nabla L(\beta^*)]_{S^c} \\ &\quad - [\nabla^2 L_n(\beta^*)]_{S^c, S} [\nabla^2 L_n(\beta^*)]_{S, S}^{-1} [\nabla L_n(\beta^*)]_S \\ &\quad + (\epsilon_n)_{S^c} \\ &\quad - [\nabla^2 L_n(\beta^*)]_{S^c, S} [\nabla^2 L_n(\beta^*)]_{S, S}^{-1} (\epsilon_n)_S. \end{aligned}$$

Using the irrepresentability condition (assumption 3 of Theorem 5.1) and the triangle inequality, we have  $\|[\nabla L_n(\check{\beta}_n)]_{S^c}\|_\infty < \tau_n$  provided that

$$\max \{ \|\nabla L_n(\beta^*)\|_\infty, \|\epsilon_n\|_\infty \} \leq \frac{\alpha}{4} \tau_n.$$

The first requirement  $\|\nabla L_n(\beta^*)\|_\infty \leq (\alpha/4)\tau_n$  is simply assumption 6 of Theorem 5.1, so it remains to determine a sufficient condition for  $\|\epsilon_n\|_\infty \leq (\alpha/4)\tau_n$ . Since  $L_n$  satisfies the  $(\beta^*, \mathcal{N}_{\beta^*})$ -LSSC with parameter  $K$ , we have from (7) that

$$\|\epsilon_n\|_\infty \leq K \|\check{\beta} - \beta^*\|_2^2,$$

provided that  $\check{\beta} \in \mathcal{N}_{\beta^*}$  (since  $\mathcal{N}_{\beta^*}$  is convex by assumption, this implies  $\beta_t \in \mathcal{N}_{\beta^*}$ ). Thus, to have  $\|\epsilon_n\|_\infty \leq \frac{\alpha}{4}\tau_n$ , it suffices that

$$\|\check{\beta} - \beta^*\|_2 \leq \frac{1}{2} \sqrt{\frac{\alpha \tau_n}{K}}$$

and  $\check{\beta} \in \mathcal{N}_{\beta^*}$ .  $\square$

To bound the distance  $\|\check{\beta} - \beta^*\|_2$ , we adopt an approach from [Ravikumar et al., 2010, Rothman et al., 2008]. We begin with an auxiliary lemma.

**Lemma 2.3.** *Let  $g : \mathbb{R}^p \rightarrow \mathbb{R}$  be a convex function, and let  $z \in \mathbb{R}^p$  be such that  $g(z) \leq 0$ . Let  $\mathcal{B} \subset \mathbb{R}^p$  be a closed set, and let  $\partial \mathcal{B}$  be its boundary. If  $g > 0$  on  $\partial \mathcal{B}$  and  $g(b) \leq 0$  for some  $b \in \mathcal{B} \setminus \partial \mathcal{B}$ , then  $x \in \mathcal{B}$ .*

*Proof.* We use a proof by contradiction. Suppose that  $z \notin \mathcal{B}$ . We first note that there exists some  $t^* \in (0, 1)$  such that  $b + t^*(z - b) \in \partial \mathcal{B}$ ; if such a  $t^*$  did not exist, then we would have  $z_t := b + t(z - b) \rightarrow z$  as  $t \rightarrow 1$ , which is impossible since  $z \notin \mathcal{B}$  and  $\mathcal{B}$  is closed.

We now use the convexity of  $g$  to write

$$g(b + t^*(z - b)) \leq (1 - t^*)g(b) + t^*g(z) \leq 0,$$

which is a contradiction since  $g > 0$  on  $\partial \mathcal{B}$ .  $\square$

The following lemma presents the desired bound on  $\|\tilde{\beta}_n - \beta^*\|_2$ ; note that this can be interpreted as the estimation error in the  $n > p$  setting, considering  $\beta_{\mathcal{S}}^*$  as the parameter to be estimated.

**Lemma 2.4.** *Define the set*

$$\mathcal{B}_{r_n} := \{\beta \in \mathbb{R}^p : \|\beta - \beta^*\|_2 \leq r_n, \beta_{\mathcal{S}^c} = 0\},$$

where

$$r_n := \frac{\alpha + 4}{\lambda_{\min}} \sqrt{s} \tau_n. \quad (9)$$

Under assumptions 1, 2, 6 and 7 of Theorem 5.1, if

$$\tau_n < \frac{3\lambda_{\min}^2}{2(\alpha + 4)Ks}, \quad (10)$$

then  $\tilde{\beta}_n \in \mathcal{B}_{r_n}$ .

*Proof.* Set  $s = |\mathcal{S}|$ , and for  $\beta \in \mathbb{R}^s$  let  $Z(\beta) = (\beta, 0) \in \mathbb{R}^p$  be the zero-padding mapping, where  $(\beta, 0)$  denotes the vector that equals to  $\beta$  on  $\mathcal{S}$  and 0 on  $\mathcal{S}^c$ . Then we have

$$\tilde{\beta}_{\mathcal{S}} = \arg \min_{\beta \in \mathbb{R}^s} \{(L_n \circ Z)(\beta) + \tau_n \|\beta\|_1\}.$$

For  $\delta \in \mathbb{R}^s$ , define

$$g(\delta) = (L_n \circ Z)(\beta_{\mathcal{S}}^* + \delta) - (L_n \circ Z)(\beta_{\mathcal{S}}^*) + \tau_n (\|\beta_{\mathcal{S}}^* + \delta\|_1 - \|\beta_{\mathcal{S}}^*\|_1).$$

We trivially have  $g(0) = 0$ , and thus  $g(\delta^*) \leq g(0) = 0$ , where  $\delta^* := \tilde{\beta}_{\mathcal{S}} - \beta_{\mathcal{S}}^*$ . Now our goal is prove that  $g > 0$  on the boundary of  $(\mathcal{B}_{r_n})_{\mathcal{S}} := \{\delta \in \mathbb{R}^s : \|\delta\|_2 \leq r_n\}$ , thus permitting the application of Lemma 2.3.

We proceed by deriving a lower bound on  $g(\delta)$ . We define  $\phi(t) := (L_n \circ Z)(\beta_{\mathcal{S}}^* + t\delta)$ , and write the following Taylor expansion:

$$\begin{aligned} & (L_n \circ Z)(\beta_{\mathcal{S}}^* + \delta) - (L_n \circ Z)(\beta_{\mathcal{S}}^*) \\ &= \phi(1) - \phi(0) \\ &= \phi'(0) + \frac{1}{2} \phi''(0) + \frac{1}{6} \phi'''(\tilde{t}), \end{aligned}$$

for some  $\tilde{t} \in [0, 1]$  (recall that  $L_n$  is three times differentiable by assumption). We bound the term  $\phi'(0)$  as follows:

$$\begin{aligned} |\phi'(0)| &= |\langle [\nabla L_n(\beta^*)]_{\mathcal{S}}, \delta \rangle| \\ &\leq \sqrt{s} \|[\nabla L_n(\beta^*)]_{\mathcal{S}}\|_{\infty} \|\delta\|_2 \\ &\leq \frac{\alpha \tau_n}{4} \sqrt{s} \|\delta\|_2, \end{aligned}$$

where the first step is by Hölder's inequality and the identity  $\|z\|_2 \leq \sqrt{s} \|z\|_1$ , and the second step uses assumption 6 of Theorem 5.1. To bound the term  $\phi''(0)$ , we use the second assumption of Theorem 5.1 to write

$$\phi''(0) = \delta^T [\nabla^2 L_n(\beta^*)]_{\mathcal{S}, \mathcal{S}} \delta \geq \lambda_{\min} \|\delta\|_2^2.$$

We now turn to the term  $\phi'''(\tilde{t})$ . Again using the fact that  $L_n$  satisfies the  $(\beta^*, \mathcal{N}_{\beta^*})$ -LSSC with parameter  $K$ , it immediately follows that  $(L_n \circ Z)$  satisfies the  $(\beta_{\mathcal{S}}^*, (\mathcal{N}_{\beta^*})_{\mathcal{S}})$ -LSSC with parameter  $K$ , where  $(\mathcal{N}_{\beta^*})_{\mathcal{S}} = \{\beta_{\mathcal{S}} : \beta \in \mathcal{N}_{\beta^*}\}$ . Hence, and also making use of Hölder's inequality and the fact that  $\|z\|_1 \leq \sqrt{s} \|z\|_2$  ( $z \in \mathbb{R}^s$ ), we have

$$\begin{aligned} |\phi'''(\tilde{t})| &= |D^3(L_n \circ Z)(\beta_{\mathcal{S}}^* + \tilde{t}\delta)[\delta, \delta, \delta]| \\ &\leq \|\delta\|_1 \|D^3(L_n \circ Z)(\beta_{\mathcal{S}}^* + \tilde{t}\delta)[\delta, \delta]\|_{\infty} \\ &\leq K \sqrt{s} \|\delta\|_2^3 \end{aligned}$$

provided that  $\beta_{\mathcal{S}}^* + \tilde{t}\delta \in (\mathcal{N}_{\beta^*})_{\mathcal{S}}$ . Since  $\mathcal{B}_{r_n} \subseteq \mathcal{N}_{\beta^*}$  by assumption 7 of Theorem 5.1, the latter condition holds provided that  $\delta \in (\mathcal{B}_{r_n})_{\mathcal{S}}$ .

Using the triangle inequality, we have

$$\| \|\beta_{\mathcal{S}}^* + \delta\|_1 - \|\beta_{\mathcal{S}}^*\|_1 \| \leq \|\delta\|_1 \leq \sqrt{s} \|\delta\|_2.$$

Hence, and combining the preceding bounds, we have  $g(\delta) \geq f(\|\delta\|_2)$ , where

$$f(x) = -\frac{\alpha \tau_n}{4} \sqrt{s} x + \frac{\lambda_{\min}}{2} x^2 - \frac{K \sqrt{s}}{6} x^3 - \sqrt{s} \tau_n x.$$

Observe that if the inequality

$$0 < x < \frac{3\lambda_{\min}}{2K\sqrt{s}}. \quad (11)$$

holds, then we can bound the coefficient to  $x^3$  in terms of that of  $x^2$  to obtain

$$f(x) > \frac{\lambda_{\min}}{4} x^2 - \left(1 + \frac{\alpha}{4}\right) \sqrt{s} \tau_n x. \quad (12)$$

By a direct calculation, this lower bound has roots at 0 and  $r_n$  (see (9)), and hence  $f(r_n) > 0$  provided that  $x = r_n$  satisfies (11). By a direct substitution, this condition can be ensured by requiring that

$$\tau_n < \frac{3\lambda_{\min}^2}{2(\alpha + 4)Ks}. \quad (13)$$

Recalling that  $g(\delta) \geq f(\|\delta\|_2)$ , we have proved that  $g$  satisfies the conditions of Lemma 2.3 with  $z = \delta^*$ ,  $b = 0$ , and  $\mathcal{B} = (\mathcal{B}_{r_n})_{\mathcal{S}}$ , and we thus have  $\delta^* \in (\mathcal{B}_{r_n})_{\mathcal{S}}$ , or equivalently  $\tilde{\beta}_n \in \mathcal{B}_{r_n}$ .  $\square$

We now combine the preceding lemmas to obtain Theorem 5.1. We require  $r_n \leq R_n$  so the assumption that  $\|\tilde{\beta} - \beta^*\|_{\infty} \leq R_n$  in Lemma 2.2 is satisfied. From the definitions in (5) and (9), this is equivalent to requiring

$$\tau_n \leq \frac{\lambda_{\min}^2}{4(\alpha + 4)^2 Ks},$$

which is true by assumption 5 of the theorem. This assumption also implies that (10) holds, since  $\frac{\alpha}{4(\alpha+4)} \leq \frac{3}{2}$  for any  $\alpha \geq 0$ . Finally, by the conclusion of Lemma 2.4, we have successful sign pattern recovery if  $\beta_{\min} \geq r_n$ , thus recovering assumption 4 of the theorem.

### 3 Proofs of the Results in Section 6

#### 3.1 Proof of Corollary 6.2

By a direct differentiation, we obtain for  $j \in \{1, \dots, p\}$  that

$$[\nabla L_n(\beta^*)]_j = - \sum_{i=1}^n \varepsilon_i(x_i)_j,$$

where  $\varepsilon_i = n^{-1}(Y_i - \mathbf{E}Y_i)$ .

Fix  $j \in \{1, \dots, p\}$ , and let  $X_i := n^{-1}(x_i)_j Y_i$ . As  $X_1, \dots, X_n$  are bounded, they can be characterized using Hoeffding's inequality [Boucheron et al., 2013].

**Theorem 3.1** (Hoeffding's Inequality). *Let  $X_1, \dots, X_n$  be independent random variables such that  $X_i$  takes its value in  $[a_i, b_i]$  almost surely for all  $i \in \{1, \dots, n\}$ . Then*

$$\begin{aligned} \mathbb{P} \left\{ \left| \sum_{i=1}^n (X_i - \mathbf{E}X_i) \right| \geq t \right\} \\ \leq 2 \exp \left[ - \frac{2t^2}{\sum_{i=1}^n (b_i - a_i)^2} \right]. \end{aligned}$$

In our case, we can set  $(b_i - a_i)^2 = n^{-2}(x_i)_j^2$ , since  $Y_i \in \{0, 1\}$ . Since  $\sum_{i=1}^n |(x_i)_j|^2 \leq n$  for all  $k$  by assumption, we obtain

$$\sum_{i=1}^n (b_i - a_i)^2 \leq \frac{1}{n}. \quad (14)$$

Thus, by Hoeffding's inequality and the union bound, we obtain

$$\begin{aligned} \mathbb{P} \left\{ \|\nabla L_n(\beta^*)\|_\infty \geq \frac{\alpha\tau_n}{4} \right\} \\ \leq \sum_{j=1}^p \mathbb{P} \left\{ \left| [\nabla L_n(\beta^*)]_j \right| \geq \frac{\alpha\tau_n}{4} \right\} \\ \leq 2 \exp(\ln p - 2nt^2) \Big|_{t=\frac{\alpha\tau_n}{4}}. \end{aligned}$$

This decays to zero provided that  $\tau_n \gg (n^{-1} \log p)^{1/2}$ . Substituting this scaling into the fifth condition of Theorem 5.1, we obtain the condition  $s^2(\log p) \nu_n^4 \gamma_n^2 \ll n$ . The required uniqueness of  $\check{\beta}$  can be proved by showing that the composition  $L_n \circ Z$  (with  $Z$  being the zero-padding of a vector in  $\mathbb{R}^s$ ) is strictly convex, given the second condition of Theorem 5.1. One way to prove this is via self-concordant like inequalities [Tran-Dinh et al., 2013]; we omit the proof here for brevity.

#### 3.2 Proof of Corollary 6.3

Let  $Y_1, \dots, Y_n$  be independent gamma random variables with shape parameter  $k > 0$  and scale parameter  $\theta_i$  respectively. We have, for  $q \in \mathbb{N}$ ,

$$\mathbf{E} |Y_i|^q = \frac{\Gamma(q+k)}{\Gamma(k)} \theta_i^q,$$

where  $\Gamma$  denotes the gamma function.

To study the concentration of measure behavior of  $\nabla L_n(\beta^*)$ , we use the following result [Boucheron et al., 2013].

**Theorem 3.2** (Bernstein's Inequality). *Let  $X_1, \dots, X_n$  be independent real random variables. Suppose that there exist  $v > 0$  and  $c > 0$  such that  $\sum_{i=1}^n \mathbf{E}X_i^2 \leq v$ , and*

$$\sum_{i=1}^n \mathbf{E} |X_i|^q \leq \frac{q!}{2} v c^{q-2}$$

for all integers  $q \geq 3$ . Then

$$\mathbb{P} \left\{ \left| \sum_{i=1}^n (X_i - \mathbf{E}X_i) \right| \geq t \right\} \leq 2 \exp \left[ - \frac{t^2}{2(v+ct)} \right].$$

We proceed by evaluating the required moments for our setting. By a direct differentiation, we obtain

$$[\nabla L_n(\beta^*)]_j = \sum_{i=1}^n \varepsilon_i(x_i)_j$$

for  $j \in \{1, \dots, p\}$ , where  $\varepsilon_i := n^{-1}(Y_i - \mathbf{E}Y_i)$ .

Fix  $j \in \{1, \dots, p\}$ , and let  $X_i := n^{-1}(x_i)_j Y_i$ . We have

$$\begin{aligned} \sum_{i=1}^n \mathbf{E}X_i^2 &= \sum_{i=1}^n \frac{(x_i)_j^2}{n^2} \mathbf{E}Y_i^2 \\ &= \sum_{i=1}^n \frac{(x_i)_j^2}{n^2} \frac{\Gamma(k+2)}{\Gamma(k)} \theta_i^2. \end{aligned}$$

Recall that  $\theta_i = k^{-1} \langle x_i, \beta^* \rangle^{-1}$ . Using the first displayed equation in Section 7.3, we have

$$\theta_i \leq (k\mu_n)^{-1}, \quad (15)$$

and thus

$$\begin{aligned} \sum_{i=1}^n \mathbf{E}X_i^2 &\leq \frac{1}{(n\mu_n)^2} \frac{\Gamma(k+2)}{k^2\Gamma(k)} \sum_{i=1}^n \frac{(x_i)_j^2}{\|x_i\|_2^2} \\ &\leq \frac{1}{n\mu_n^2} \frac{\Gamma(k+2)}{k^2\Gamma(k)}, \end{aligned}$$

where we have applied the assumption  $\sum_{i=1}^n (x_i)_j^2 \leq n$ . Using the identity  $\Gamma(k+2) = k(k+1)\Gamma(k)$ , we obtain

$$\sum_{i=1}^n \mathbf{E}X_i^2 \leq \frac{k+1}{n\mu_n^2 k}.$$

As for the moments of higher orders, we have

$$\begin{aligned} \sum_{i=1}^n \mathbb{E} |X_i|^q &= \sum_{i=1}^n \frac{|(x_i)_j|^q}{n^q} \mathbb{E} |Y_i|^q \\ &= \sum_{i=1}^n \frac{|(x_i)_j|^q}{n^q} \frac{\Gamma(k+q)}{\Gamma(k)} \theta_i^q. \end{aligned}$$

With the upper bound (15) on  $\theta_i$ , we have

$$\begin{aligned} \sum_{i=1}^n \mathbb{E} |X_i|^q &\leq \frac{\Gamma(k+q)}{(kn\mu_n)^q \Gamma(k)} \sum_{i=1}^n |(x_i)_j|^q \\ &= \frac{\Gamma(k+q)}{(kn\mu_n)^q \Gamma(k)} \|((x_1)_j, \dots, (x_n)_j)\|_q^q. \end{aligned}$$

Using the identity  $\|z\|_q \leq \|z\|_2$  for  $q \geq 2$ , and the assumption  $\sum_{i=1}^n (x_i)_j^2 \leq n$ , we obtain

$$\sum_{i=1}^n \mathbb{E} |X_i|^q \leq \frac{\Gamma(k+q)}{(k\sqrt{n}\mu_n)^q \Gamma(k)}.$$

For  $k \in (0, 1]$ , we have  $\frac{\Gamma(k+q)}{\Gamma(q)} \leq q!$ , and hence by a direct substitution it suffices to choose

$$v = \frac{k+1}{n\mu_n^2 k^2}, \quad c = \frac{1}{k\sqrt{n}\mu_n}. \quad (16)$$

For  $k \in (1, \infty)$ , we have by induction on  $q$  that  $\frac{\Gamma(k+q)}{\Gamma(q)} \leq q!k^q$ . Thus, for  $k \in (1, \infty)$ , it suffices that

$$v = \frac{2k}{n\mu_n^2}, \quad c = \frac{1}{\sqrt{n}\mu_n}. \quad (17)$$

Thus, applying Bernstein's inequality and the union bound, we obtain

$$\begin{aligned} &\mathbb{P} \left\{ \|\nabla L_n(\beta^*)\|_\infty \geq \frac{\alpha\tau_n}{4} \right\} \\ &\leq \sum_{i=1}^p \mathbb{P} \left\{ |[\nabla L_n(\beta^*)]_i| \geq \frac{\alpha\tau_n}{4} \right\} \\ &\leq 2 \exp \left[ \ln p - \frac{t^2}{2(v+ct)} \right] \Big|_{t=\frac{\alpha\tau_n}{4}}. \end{aligned}$$

Since  $L_n$  is self-concordant and  $[D^2 L_n(\beta^*)]_{\mathcal{S}, \mathcal{S}}$  is positive definite by assumption, the composition  $L_n \circ Z$  with the padding operator  $Z$  is strictly convex [Nesterov, 2004, Nesterov and Nemirovskii, 1994] and thus  $\check{\beta}_n$  uniquely exists. Therefore, we can apply Theorem 5.1. The scaling laws on  $\tau_n$  and  $(p, n, s)$  follow via the same argument to that in the proof of Corollary 6.2. Note that the final condition of Theorem 5.1 also imposes conditions on  $(p, n, s)$ , but for this term even the weaker condition  $s^2(\log p)\nu_n^2 \ll n$  suffices.

## 4 Proof of Corollary 6.4

By a direct differentiation, we obtain

$$\nabla L_n(\Theta^*) = \hat{\Sigma}_n - (\Theta^*)^{-1} = \hat{\Sigma}_n - \Sigma.$$

We apply the following lemma from [Ravikumar et al., 2011] to study the concentration behavior of  $\nabla L_n(\Theta^*)$ .

**Lemma 4.1.** *Let  $\Sigma$  and  $\hat{\Sigma}_n$  be defined as in Section 6.4. We have*

$$\begin{aligned} &\mathbb{P} \left\{ \left| \left( \hat{\Sigma}_n \right)_{i,j} - \Sigma_{i,j} \right| > t \right\} \\ &\leq 4 \exp \left[ -\frac{nt^2}{128(1+4c^2)^2 \kappa_{\Sigma^*}^2} \right], \end{aligned}$$

for all  $t \in (0, 8\kappa_{\Sigma^*}(1+c)^2)$ .

Using the union bound, we have

$$\begin{aligned} &\mathbb{P} \left\{ \|\nabla L_n(\Theta^*)\|_\infty \leq \frac{\alpha\tau_n}{4} \right\} \\ &\leq 4p^2 \exp \left[ -\frac{nt^2}{128(1+4\sigma^2)^2 \kappa_{\Sigma^*}^2} \right] \Big|_{t=\frac{\alpha\tau_n}{4}}, \end{aligned}$$

provided that  $\tau_n \rightarrow 0$ , and that  $n$  is large enough so that the upper bound on  $t$  in the lemma is satisfied.

Define

$$\begin{aligned} \check{\Theta}_n &\in \arg \min_{\Theta} \{L_n(\Theta) + \tau_n |\Theta|_1 : \\ &\Theta > 0, \Theta_{\mathcal{S}^c} = 0, \Theta \in \mathbb{R}^{p \times p}\}. \end{aligned} \quad (18)$$

Since  $L_n$  is self-concordant and  $[D^2 L_n(\Theta^*)]_{\mathcal{S}, \mathcal{S}}$  is positive definite by assumption, the composition  $L_n \circ Z$  with the padding operator  $Z$  is strictly convex [Nesterov, 2004, Nesterov and Nemirovskii, 1994] and thus  $\check{\Theta}_n$  uniquely exists. Therefore, we can apply Theorem 5.1. The scaling laws on  $\tau_n$  and  $(p, n, s)$  follow via the same arguments as the preceding examples.

## References

- [Boucheron et al., 2013] Boucheron, S., Lugosi, G., and Massart, P. (2013). *Concentration Inequalities: A Nonasymptotic Theory of Independence*. Oxford Univ. Press, Oxford.
- [Nesterov, 2004] Nesterov, Y. (2004). *Introductory Lectures on Convex Optimization*. Kluwer, Boston, MA.
- [Nesterov and Nemirovskii, 1994] Nesterov, Y. and Nemirovskii, A. (1994). *Interior-Point Polynomial Algorithms in Convex Programming*. SIAM, Philadelphia, PA.

- [Ravikumar et al., 2010] Ravikumar, P., Wainwright, M. J., and Lafferty, J. D. (2010). High-dimensional Ising model selection using  $\ell_1$ -regularized logistic regression. *Ann. Stat.*, 38(3):1287–1319.
- [Ravikumar et al., 2011] Ravikumar, P., Wainwright, M. J., Raskutti, G., and Yu, B. (2011). High-dimensional covariance estimation by minimizing  $\ell_1$ -penalized log-determinant divergence. *Electron. J. Stat.*, 5:935–980.
- [Rothman et al., 2008] Rothman, A. J., Bickel, P. J., Levina, E., and Zhu, J. (2008). Sparse permutation invariant covariance estimation. *Elect. J. Stat.*, 2:494–515.
- [Tran-Dinh et al., 2013] Tran-Dinh, Q., Li, Y.-H., and Cevher, V. (2013). Minimization of self-concordant like functions.
- [Wainwright, 2009] Wainwright, M. J. (2009). Sharp thresholds for high-dimensional and noisy sparsity recovery using  $\ell_1$ -constrained quadratic programming (Lasso). *IEEE Trans. Inf. Theory*, 55(5):2183–2202.
- [Zeidler, 1995] Zeidler, E. (1995). *Applied Functional Analysis: Main Principles and Their Applications*. Springer-Verl., New York, NY.
